# Supplementary material
Source: PubMed Central journal article supplement (PMC3917603)

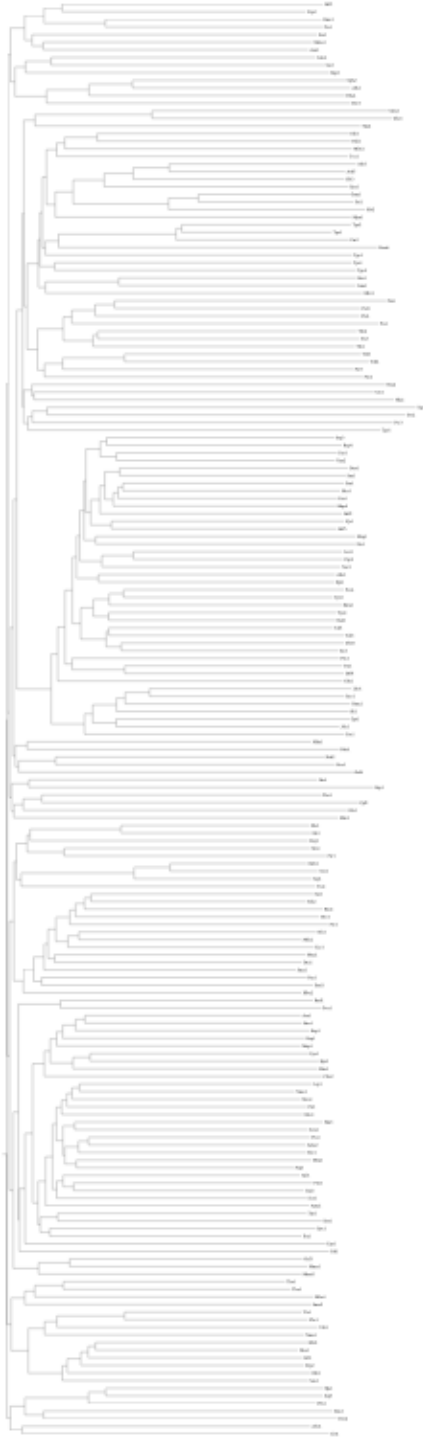

Supplement: NIHMS345093-supplement-01.pdf [file NIHMS345093-supplement-01.pdf]

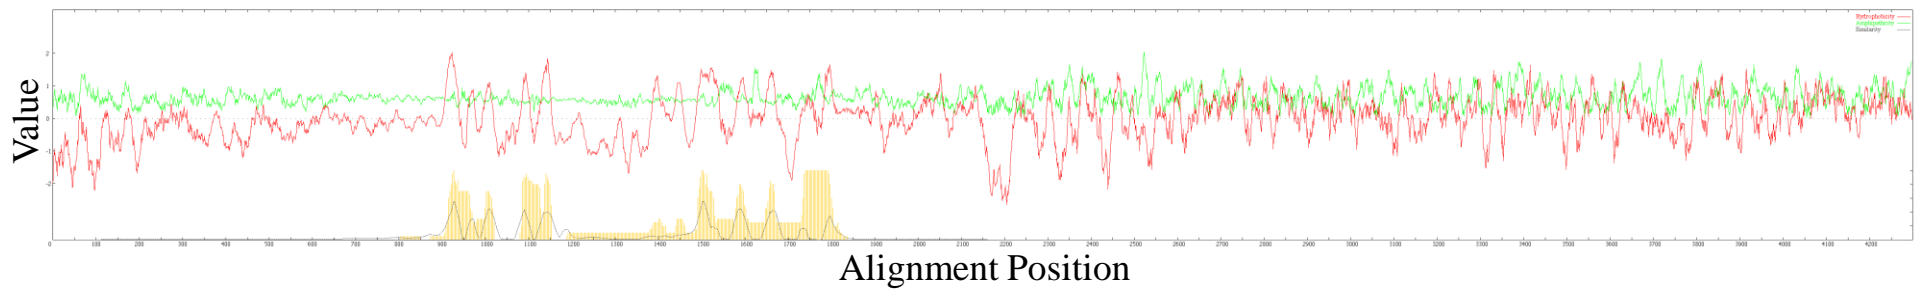

Supplement: NIHMS345093-supplement-02.pdf [file NIHMS345093-supplement-02.pdf]



Supplement: NIHMS345093-supplement-03.pdf [file NIHMS345093-supplement-03.pdf]
